# Supplementary material for: Dietary limonin ameliorates heart failure with preserved ejection fraction by targeting ferroptosis via modulation of the Nrf2/SLC7A11/GPX4 axis: an integrated transcriptomics and metabolomics analysis
Source: Royal Society of Chemistry journal article supplement (doi:10.1039/d5fo00475f), 2025-01-01
Supplement: d5fo00475f2.xlsx [file d5fo00475f2.xlsx]

## Sheet: Figure 1
Raw data of Figure 1
Figure 1C
Weeks	CON										Model										Li25										Li50										Li100
1	23.3	23.3	24	23.5	23.4	24.2	24.3	24.5	25	24.7	24.4	24.3	24.6	25.4	24.6	24.6	24.4	25.1	24.4	24.8	24.6	25.1	25.3	24	24.8	23.7	25	24.7	23.9	23.7	24.1	24.6	23.7	22	24.2	24.1	23.6	22.9	24.5	23.8	23.7	23.8	22.5	24.3	24.3	23.5	23.3	23.5	23.9
2	25.2	24.9	25.1	24.4	24.8	24.4	24	24.1	23.5	22.8	27.5	26.8	27.5	27.4	25.7	28.9	29	27.1	27.1	26.9	28.9	27.5	26.4	27.4	28.7	27.4	26.1	26.2	27.2	28.6	27.2	26.9	27.4	28.1	27.2	27.4	28.2	27.9	26.9	26.8	26	28.9	26.9	29.4	26.8	28.5	28.6	27.7	28.9
3	26.5	23.8	24.8	25.3	26	25.5	24	24	25	23.3	30.6	28.7	28.3	27.2	29.1	30.9	28.6	30.6	29.3	29.7	29.4	30.3	27.5	26.4	30.6	29.2	28.7	30.3	29.5	29.3	30.5	29.6	29.4	30.4	29.7	29.4	31.4	29.9	32.1	29.2	32	28.8	32.4	31.6	32.6	31.6	28.8	30	29.7
4	26	26.4	26.3	25.9	26.6	23.9	25.2	24.1	23.7	24.6	31.5	32.8	28.6	29.5	30	31.9	31.8	32.8	30.2	29.3	33.2	29.7	29.7	30.3	32.6	33.4	32.3	30.8	30.9	31.2	33.4	33.2	33.5	32.6	30.2	32.3	30.8	31.8	32.4	29.9	32.1	32.9	30.8	31	33	33.4	31.7	32.8	32.3
5	26	26.4	27.3	26.6	25.4	24.1	25.6	25.7	26.4	26.9	32.5	32.2	35	31.1	29.5	36.2	34.7	31.1	33.2	37	33.2	32.3	31.7	30.9	32.9	33.2	34.2	30.7	32.4	32.9	31.6	32.6	32.9	30.8	32.2	32.4	32.7	33.9	32.8	30.6	34.4	32.2	30.6	34.2	31.8	31.6	33.7	32.3	33.7
6	26	29	28	26.2	27.8	26.9	27	28.1	27.2	25.2	37.5	33.9	33.5	32.4	30.6	38.6	36.4	38.1	35.4	38.3	36.2	31.9	31.8	33.7	32.3	38.4	38.1	37.9	34.5	36.7	37.9	34.8	31.5	32.3	30.7	37.7	35.9	36.1	35.8	39.1	37.4	33.8	31.5	31	31	39.2	38.3	37.3	34.6
7	27.3	26.6	26.4	26.9	28.1	26.9	27.9	28	27.5	26.9	36	42.2	40.1	33.5	33	40	39	39.1	40.3	39.8	34.2	31	34.5	32.9	39.6	34.8	35.6	42.2	37	38.3	39.5	36.4	35.4	37.1	35.3	32	38.7	36	35.6	34.1	32.4	32.3	39.1	32.3	33.9	36.7	38.3	38.5	35.5
8	27.1	28.7	28.3	25	29.5	30	27.1	28.3	26.9	30	44.6	39.5	39.6	36.4	39.4	39.4	35.8	34.3	42.8	42.8	39.5	44.6	39	36.2	36	35	41.3	36.1	35	34.1	33.3	32.7	40	33.2	32.8	37.3	37.7	34	40	38	39.1	38	36.6	31.4	39.8	31	32.9	32.8	33.9
9	28.6	28.7	30	28.8	28.4	30.9	27	30.4	29.5	29.8	36.7	40.7	47	45.3	42.2	43.2	42.5	48.4	38.8	40.9	42.5	36.5	35	33.1	35.8	40	47	37.1	37	40.4	39.2	36.6	41.9	39.5	39.3	33.5	33.5	34.3	34.7	41.3	33.3	30.2	31.1	34.5	32.4	32	40.2	36.8	41.6
10	28	27.8	30	28.1	28.3	30.4	27.9	31	29.6	30.1	47	41.6	43.6	47.2	48.9	45.8	41.4	37.2	49.3	39.4	33	36.6	36	43.7	36.5	37.7	42.7	48.7	41.1	39.3	42.9	40.2	41.3	41.1	36.7	33.5	34.5	33.9	42.8	34.4	36.2	31.1	33.2	30.8	32.8	40.7	41.3	31.5	42.6
11	30.1	28.2	28.6	29.1	30.3	31.4	27.5	31.8	30.5	31	48.5	43	50.3	50.4	48.9	47.7	43.1	39.3	45.3	41	38	35.1	32.9	37.9	44.6	44.1	50.5	38.6	40.9	44.1	38	41.4	38	43.3	42.6	43.9	34.3	33.4	34.7	33.8	38.2	33.6	33.9	32.2	31.7	41.5	43.8	36.5	30
12	30.9	31.2	29.4	29.3	28.6	30.6	30.5	29.5	31.2	28.5	50.2	51.3	49	50.8	49.8	47.9	46.2	41.3	46.2	43.1	38.4	36.8	33.2	38.2	44.5	45.6	49.1	37.9	41.9	44.8	38.6	42.3	37.1	42.4	41.8	45.6	35.1	34.9	35.2	34	38.9	34.3	34.7	32.6	32	42.8	44	35.4	31.2
Figure 1D
Time(min)	CON							Model							Li25							Li50							Li100							EMA
0	155.86	169.79	171.05	191.87	177.03	159.01	185.59	151.28	169.37	153.07	157.58	165.06	156.28	168.84	156.45	150.25	153.71	157.57	166.53	164.96	157.16	158.01	165.81	165.39	164.37	164.99	162.83	156.29	169.77	153.37	159.83	168.14	153.31	155.81	160.42	167.48	163.3	162.97	152.99	163.78	157.17	163.2
15	362.08	324.16	352.55	425.96	338.36	407.16	372.23	423.31	401.07	414.6	422.8	426.25	423.34	411.02	378.54	385.27	394.44	380.63	373.12	363.1	403.76	388.12	360.41	365.43	378.87	395.9	379.48	362.46	379.73	385.03	365.87	354.69	378.28	359.25	376.6	376.24	365.67	359.53	354.61	373.02	362.33	396.65
30	393.41	342.75	371.86	382.7	368.14	418.94	397.77	490.93	505.73	494.34	519.18	519.9	482.11	489.46	465.29	449.6	460.23	441.08	453.27	442.3	471.58	436.11	442.88	433.86	448.04	447.66	440.14	436.26	409.68	437.7	431.16	418.74	431.26	425.09	422.98	382.11	394.11	391.45	398.26	400.31	416.96	406.04
60	249.68	237.01	206.99	241.56	241.14	235.73	231.64	434.19	445.47	420.31	446.67	444.53	444.62	427.71	394.73	439.9	423.98	413.21	388.05	419.12	407.61	342.52	362.36	370.89	369.52	359.91	349.09	341.23	313.51	328.72	331.94	302.91	326.58	331.99	326.58	288.38	265.88	247.76	293.16	296.08	280.65	304.01
90	220.52	210.38	190.8	202.12	207.26	210.15	215.48	353.9	361.41	354.57	377.37	364.63	361.21	375.73	327.07	313.04	320.1	326.89	326.14	346.41	335.43	298.21	280.44	272.84	279.39	297.93	284.13	296.6	257.51	269.29	272.94	270.13	266.37	273.58	286.53	225.18	242.16	231.27	249.94	252.53	235.44	225.23
120	162.14	169.59	165.99	163.08	174.45	178.74	164.26	296.22	250.25	261.83	264.83	283.21	281.23	289.39	231.63	242.76	232.96	228.32	221.77	228	226.35	209.72	219.23	203.6	216.34	199.78	227.93	192.77	180.32	188.39	196.96	190.18	195.55	183.54	194.76	200.84	194.19	198.31	179.39	178.71	169.19	173.36
Figure 1E						Figure 1F						Figure 1G						Figure 1H						Figure 1I						Figure 1J
CON	Model	Li25	Li50	Li100	EMA	CON	Model	Li25	Li50	Li100	EMA	CON	Model	Li25	Li50	Li100	EMA	CON	Model	Li25	Li50	Li100	EMA	CON	Model	Li25	Li50	Li100	EMA	CON	Model	Li25	Li50	Li100	EMA
31990	46616	42449	39187	36022	33917	2.41	5.23	3.252	3.598	2.48	3.762	0.57	0.82	0.414	0.648	0.29	0.526	1.98	3.53	2.28	2.796	2	2.66	0.1	0.58	0.446	0.42	0.23	0.446	0.43	1.52	0.446	0.42	0.23	0.343598
29813	46625	43252	39187	37540	33731	2.56	4.32	2.776	2.996	2.98	4.83	0.62	0.902	0.452	0.332	0.47	0.446	1.85	3.04	2.132	2.306	2.05	3.634	0.12	0.69	0.31	0.356	0.18	0.706	0.58	1.05	0.31	0.356	0.18	0.551729
29362	45664	43241	38850	37489	32768	2.59	3.96	3.146	3.574	2.65	3.638	0.84	0.776	0.6	0.374	0.2	0.588	2.04	2.92	2.452	2.524	1.7	2.45	0.28	0.61	0.41	0.366	0.48	0.378	0.55	0.94	0.41	0.366	0.48	0.372179
32196	47899	42443	39709	36047	34411	2.22	3.6	3.512	4.12	2.88	3.49	0.45	0.78	0.866	0.686	0.32	0.492	1.53	2.69	2.738	3.168	2.11	2.38	0.28	0.45	0.584	0.184	0.35	0.588	0.48	0.74	0.584	0.184	0.35	0.456992
30755	47852	41797	39980	37249	34970	2.65	4.94	3.952	2.86	2.33	4.202	0.65	1.104	0.666	0.634	0.41	0.504	1.86	3.38	2.876	1.94	1.72	3.01	0.16	0.66	0.138	0.242	0.06	0.588	0.34	1.29	0.138	0.242	0.06	0.544836
32784	46763	43021	39232	37042	34016	2.57	4.4	4.44	3.67	2.82	3.51	0.62	0.874	0.89	0.494	0.4	0.544	2.14	2.64	3.594	2.702	2.23	2.466	0.15	0.54	0.456	0.336	0.3	0.44	0.27	1.46	0.456	0.336	0.3	0.565752
31803	46889	43532	38451	37684	34787	1.55	4.43	3.752	3.652	2.88	2.77	0.4	1.26	0.636	0.57	0.76	0.83	1.29	2.79	2.834	2.518	2.02	1.91	0.03	0.59	0.446	0.226	0.27	0.25	0.11	1.46	0.446	0.226	0.27	0.71
Figure 1K						Figure 1L
CON	Model	Li25	Li50	Li100	EMA	CON	Model	Li25	Li50	Li100	EMA
78.825	152.85	131.875	123.375	132	123.875	50.5	125.55	107.375	88.125	107.5	96.375
95.275	164.65	142.5	138.25	131.5	129	69.275	120.75	110	98.25	94.125	90.375
102.375	166.225	142	125.625	118.125	131.125	81.825	138.225	114.875	97	90.75	92.75
104.525	151.5	138.125	124.125	123.875	146.25	77	117.975	103.375	91.5	99.5	113.625
89.325	156.375	130.875	126.375	122.5	136.125	70.45	136.7	100.875	101.375	103.375	111
84.475	140.575	131.75	137.125	110.5	118.375	63.4	116.85	104.375	114.75	79.875	87.625
107.5	152.75	132.875	136.625	130.875	127.25	81.975	135.575	102.125	102.25	100.75	89.125
103.625	160.65	127.25	119.375	131.375	144.333	81.175	128.15	115.75	94.25	105.375	117.333
89.75	153	129	113.75	119.25	126.5	59.675	128.275	108.75	88.75	87.25	94.125
100.4	160.65	130.625	129.5	131.125	140.25	73.575	121.85	97.625	100.125	104	105.5
[truncated: 11 more columns]

## Sheet: Figure 2
Raw data of Figure 2
Figure 2B						Figure 2C						Figure 2D						Figure 2E
CON	Model	Li25	Li50	Li100	EMA	CON	Model	Li25	Li50	Li100	EMA	CON	Model	Li25	Li50	Li100	EMA	CON	Model	Li25	Li50	Li100	EMA
68.3849	62.4325	73.9604	69.893	76.8296	78.0488	1.50386	2.0156	1.60745	1.5117	1.47677	1.65071	0.946138	1.36401	1.19929	0.955674	1.09468	1.09468	1.04573	1.71152	1.26418	1.04255	1.08582	1.27713
68.9042	70.1144	61.6629	73.3701	74.1745	70.2623	1.52908	1.90266	1.63333	1.68546	1.54628	1.52908	0.738475	1.33794	1.225	0.998936	1.06862	0.946986	1.10337	1.63333	1.31188	1.225	1.32926	1.17287
65.6846	78.3716	70.6356	76.8881	75.9925	70.394	1.18156	1.7984	1.48564	1.59858	1.58121	1.48564	0.747163	1.32926	0.964362	1.0078	0.668972	0.825355	1.08599	1.68546	1.39468	1.19894	1.18156	1.26844
76.8808	75.3161	66.4164	69.1381	72.0113	73.442	1.57252	1.78972	1.65957	1.37269	1.53333	1.9461	0.912234	1.12075	0.990426	1.04255	0.773227	1.19894	1.31188	1.72021	1.26862	1.01649	1.18156	1.56383
72.4412	69.5876	76.3821	70.7202	72.0756	69.3713	1.35532	1.85922	1.68546	1.69415	1.55514	1.75497	0.721099	1.14681	0.920922	0.92961	1.05993	0.964362	1.04255	1.63333	1.37269	1.18156	1.15975	1.20762
72.7458	79.119	68.0542	67.463	76.7343	75.8782	1.45089	1.96348	1.39007	1.52908	1.69415	1.74628	0.738475	1.21631	0.773227	0.955674	1.03387	1.01649	1.25106	1.6594	0.981738	1.21631	1.0773	1.30319
69.8868	72.8426	81.7807	72.7238	68.2836	75.8797	1.63333	1.84184	1.72021	1.66809	1.39007	1.69415	0.955674	1.19025	1.0773	0.764539	1.02518	1.17287	1.28582	1.63333	1.28582	1.30319	1.02518	1.46826
70.134	80.9327	78.0557	65.5664	69.8691	66.9105	1.69415	1.85053	1.57252	1.54645	1.49433	1.66157	1.12943	1.21631	0.955674	0.894858	0.851418	1.05558	1.23369	1.62464	1.39876	1.39007	1.17287	1.15332
72.3228	77.0522	66.3151	77.1474	70.9029	81.1039	1.47695	1.7984	1.65514	1.59858	1.48564	2.02429	0.920922	1.30319	0.92961	0.938298	0.799291	1.39876	1.10337	1.61596	1.13812	1.13812	1.02518	1.58989
70.5308	80.529	70.921	67.3736	69.9144	68.7216	1.64202	1.86791	1.59858	1.52908	1.55514	1.4422	0.964362	1.225	1.02518	1.05124	0.84273	1.01649	1.2945	1.65071	1.21631	1.19894	1.25106	1.25975
Figure 2F						Figure 2G						Figure 2H						Figure 2I
CON	Model	Li25	Li50	Li100	EMA	CON	Model	Li25	Li50	Li100	EMA	CON	Model	Li25	Li50	Li100	EMA	CON	Model	Li25	Li50	Li100	EMA
0.866463	1.18156	0.695035	0.84273	0.773227	0.84273	2.1313	1.32057	2.13723	1.96348	2.17199	1.7984	3.39614	3.29273	3.69238	3.17979	3.94433	3.30142	53.5474	80.7249	71.7172	70.7447	61.9107	72.7125
0.790603	1.12075	1.0773	0.799291	0.860106	0.695035	2.3805	1.39876	2.11986	2.05036	2.05904	2.17199	3.84007	2.96259	3.11897	3.50124	3.56206	3.55337	54.8619	78.3725	72.5134	72.9111	68.3289	65.9164
0.686348	1.19894	0.858475	0.764539	0.660284	0.721099	2.40656	1.62464	2.24149	1.89397	2.03298	2.25887	3.72713	3.24929	3.39238	3.41436	3.62287	3.70975	54.0511	82.0413	76.4256	73.43	69.9611	66.1572
0.781915	1.24238	0.837979	0.668972	0.790426	1.02518	2.10248	1.53777	1.87642	2.45	2.04167	2.20674	3.81401	2.93653	3.22323	3.97039	3.41436	3.78794	56.6647	79.2954	75.8416	65.5967	66.0379	68.9315
0.721099	1.13812	0.894858	0.773227	0.825355	0.799291	2.25887	1.68546	2.11117	2.12855	2.31968	2.34574	3.82269	3.28404	3.79663	3.50124	3.90957	3.80532	60.9437	81.0668	74.6526	65.6385	70.5779	71.6714
0.755851	1.2945	0.816667	0.755851	0.721099	0.912234	2.38918	1.66809	2.0023	2.17199	2.08511	1.97216	4.07465	3.23191	3.26631	3.42305	3.77057	3.50124	53.9665	85.8463	75.2346	72.4156	72.3312	69.2191
0.799291	1.19025	0.851418	0.773227	0.712411	0.92961	2.19805	1.7289	1.68546	2.17199	2.36312	1.83316	3.57943	3.2406	3.32748	3.68369	3.77926	3.2406	54.9812	82.2128	70.1004	72.2853	71.4731	69.9096
0.88617	1.225	0.999291	0.955674	0.760106	0.834043	2.05904	1.56383	1.80709	2.59769	2.07642	2.37181	3.35355	3.01472	3.31879	4.03121	3.69238	3.72713	51.9304	86.0759	74.3425	67.7287	62.8174	71.5217
0.651596	1.12943	0.851418	0.773227	0.686348	0.955674	2.11117	1.91135	1.97216	1.8766	2.03298	1.76365	3.55337	2.91915	4.23972	3.39699	3.34486	3.44043	52.9842	78.8483	73.3355	66.3207	63.7901	74.4
0.825355	1.14681	0.812411	0.851418	0.825355	0.729787	2.18936	1.74628	1.97216	2.28493	2.29362	2.26755	3.59681	3.14504	3.2406	3.6055	3.7445	3.64025	64.0308	89.4358	74.7853	67.7778	65.9357	73.024

## Sheet: Figure 3
Raw data of Figure 3
Figure 3E						Figure 3F						Figure 3G
CON	Model	Li25	Li50	Li100	EMA	CON	Model	Li25	Li50	Li100	EMA	CON	Model	Li25	Li50	Li100	EMA
122	407	251	156	179	141	0.82	4.24	3.34	1.24	1.25	2.14	0.767084	5.68451	4.82761	1.57291	0.878612	0.606767
127	412	199	231	226	294	0.78	4.37	3.07	2.47	0.87	2.68	1.71399	13.1707	4.05507	2.24913	1.07661	1.04307
138	423	399	102	364	297	0.95	5.19	2.54	1.98	1.21	2.92	0.689623	16.5418	3.14147	1.62258	0.85556	1.04099
158	432	161	271	370	272	0.92	3.84	2.19	2.75	1.34	3.99	1.3925	14.1303	2.32568	1.15584	0.992146	0.796222
162	443	182	367	401	283	1.06	3.67	3.58	2.48	1.12	2.64	0.683359	15.8186	2.33676	1.55529	1.00589	0.461019
187	454	151	222	410	417	0.64	4.92	3.21	2.92	1.54	2.31	0.753444	12.5626	2.77094	1.44655	0.978585	0.776129
220	454	275	118	343	404
220	469	155	186	293	346
237	469	230	206	270	269
248	477	138	208	374	325
248	485	326	188	123	452
260	485	162	317	192	301
260	497	318	178	72	407
265	505	341	223	165	198
285	505	247	292	331	169
285	510	309	268	309	326
289	520	214	363	362	181
290	529	204	521	376	447
294	531	422	280	236	623
295	553	225	171	261	90
300	554	62	251	230	409
304	556	338	301	344	375
316	556	277	396	260	351
316	558	418	297	172	221
320	560	378	521	202	368
321	569	405	233	343	79
323	570	243	185	108	421
336	589	308	162	102	258
363	596	414	210	242	251
370	605	263	254	125	177
372	605	286	235	116	341
233	608	309	154	172	162
382	616	257	168	343	155
384	623	124	239	450	286
231	623	373	346	167	282
389	623	87	169	223	184
414	633	415	449	298	220
414	637	120	128	232	183
90	646	192	228	220	337
240	649	344	188	96	322
428	663	123	169	252	239
211	682	562	210	122	229
91	682	404	188	201	258
250	705	180	372	373	133
223	711	124	181	181	223
278	720	342	264	239	275
223	737	290	274	276	305
248	737	286	194	225	265
84	794	263	123	221	297
212	822	288	70	256	201

## Sheet: Figure 4
Raw data of Figure 4
Figure 4B						Figure 4C						Figure 4D						Figure 4E
CON	Model	Li25	Li50	Li100	EMA	CON	Model	Li25	Li50	Li100	EMA	CON	Model	Li25	Li50	Li100	EMA	CON	Model	Li25	Li50	Li100	EMA
1.38917	1.55146	1.47181	1.26743	1.22746	1.3018	1.24841	0.680068	0.871429	0.933333	1.5	0.730769	18.4932	55.8201	34.0521	32.6604	20.1685	38.3596	2.75473	9.25953	4.55354	3.41825	2.53954	2.26585
1.22416	1.5406	1.42654	1.06308	1.16264	1.1424	1.35099	0.479769	0.752809	0.978022	1.15306	0.631579	25.6604	60.7984	35.3779	27.3931	23.1336	55.0845	2.31492	9.0992	4.46069	4.8517	3.59302	2.79408
1.39933	1.71623	1.32434	1.26743	1.40775	1.65065	1.25294	0.581699	0.851316	0.916667	1.03106	1.2071	19.2445	45.0286	28.4103	32.4341	27.5835	26.2657	2.39612	12.1091	5.29145	2.276	2.20806	6.71678
1.19406	2.31781	1.16146	1.26141	1.41989	1.06285	1.15863	0.459302	0.860294	1.21622	1.12381	0.645833	23.942	39.4236	28.1807	27.5009	24.2573	42.8357	2.74462	10.8814	2.63958	3.12881	3.95672	4.42755
1.33074	1.51791	1.33473	1.19734	1.29301	1.26446	1.10968	0.644444	1.0578	0.992857	1.36539	0.685714	25.1542	43.0546	33.9393	27.8552	29.6382	30.3443	3.23316	13.4202	5.68233	4.00417	1.93485	3.81732
1.29172	2.19734	1.23125	1.51375	1.14004	1.40264	1.15094	0.597744	1.06294	0.761495	0.964872	0.779412	20.664	45.1289	31.179	31.1438	27.9786	31.5025	3.00417	10.0669	5.89842	3.14967	3.30685	2.41436
1.25972	1.50556	1.46562	1.30587	1.2722	1.94701	1.12962	0.64876	0.832	1.01212	1.35345	1.28395	21.5212	41.8633	32.6811	29.3953	27.0046	28.2744	2.62023	13.9413	3.45416	2.75423	2.03636	6.43368
1.29973	1.90157	1.41474	1.33466	1.34657	1.4552	1.31646	0.609818	0.868217	0.99929	1.36145	0.947059	19.3217	44.4004	31.2009	32.7174	30.9005	30.647
1.41199	1.63316	1.3925	1.37626	1.17517	1.12669	1.34553	0.684783	0.761111	1.00618	1.36145	0.790698	21.1883	56.9051	33.0843	30.6706	30.9005	30.4548
1.18353	2.03184	1.63426	1.55401	1.12882	1.0263	1.23154	0.67708	0.911111	0.709302	1.01449	0.576159	24.1247	57.9864	33.1372	30.1737	27.4404	36.434
Figure 4F						Figure 4G						Figure 4H						Figure 4I
CON	Model	Li25	Li50	Li100	EMA	CON	Model	Li25	Li50	Li100	EMA	CON	Model	Li25	Li50	Li100	EMA	CON	Model	Li25	Li50	Li100	EMA
-8252.95	-7772.77	-7959.67	-10238.5	-9117.66	-8857.06	8.31777	11.7677	9.94444	8.15479	8.491	9.13916	91.5791	116.578	90.3735	105.038	91.2573	95.4221	8097.86	7761.55	8176.24	7909.87	9054.47	8285.59
-8667.89	-6477.21	-7077.61	-8989.7	-10307.4	-8104.93	9.4349	11.5521	8.80239	9.62819	7.74159	9.07512	96.3014	117.372	102.736	109.105	84.3642	87.191	9462.7	9168.72	9064.98	9169.98	8031.21	6851.06
-7511.69	-7987.68	-9017.47	-8788.81	-8228.72	-9990.9	9.76673	11.2894	9.66627	8.08342	9.2614	9.47423	93.4936	133.187	109.715	92.2558	100.54	115.061	7673.57	8329.81	8368.16	7273.54	7837.4	9485.99
-7797.66	-7409.44	-8754.67	-9162.25	-9253.57	-8402.71	9.46438	12.7832	8.75832	8.61671	7.75314	10.2725	94.7264	139.462	104.381	95.0674	95.5687	116.278	8631.82	8300.25	7973.92	7856.76	8398.8	9316.23
-7897.85	-7668.27	-9267.3	-7895.98	-8424.55	-8956.38	8.89065	11.5805	11.2613	9.21182	9.79714	10.38	90.8785	135.072	110.649	91.7228	102.679	120.421	7919.61	8616.13	7956.39	7882.47	8281.68	8928.92
-9884.19	-6794.42	-8421.86	-9963.32	-8736.87	-8274.4	9.21182	12.4002	10.7609	8.86617	9.19184	12.1107	100.598	145.611	113.493	104.192	106.576	111.783	7696.03	9128.02	8261.61	8575.75	8707.49	7357.96
-10139.3	-5599.17	-9251.81	-8566.08	-9492.73	-7809.7	6.74566	13.6083	11.0447	9.7811	9.58538	10.0988	96.7293	138.344	120.174	100.429	107.254	109.233	9807.78	8248.6	8473.34	8748.76	8960.7	8144.04
Figure 4J						Figure 4K
CON	Model	Li25	Li50	Li100	EMA	CON	Model	Li25	Li50	Li100	EMA
31.8841	68.1861	42.8109	61.2332	40.7854	53.2458	65.4583	84.9057	76.9803	81.8617	70.3484	75.9069
35.6264	76.2646	77.5739	60.3745	39.6121	42.8597	72.4862	85.6909	83.7433	77.488	72.3024	72.3473
39.329	56.8437	58.9706	51.6536	45.0333	54.49	79.0647	103.601	80.9814	73.066	73.3481	71.0699
15.3463	62.6737	34.6091	25.2298	41.6074	55.0576	70.9175	88.734	82.7723	75.7182	71.6912	81.589
25.0641	140.011	53.3479	28.0236	24.1598	50.6279	75.0426	81.6168	77.3616	74.4134	72.1802	78.5836
33.9909	77.6744	85.9778	36.1628	32.8453	43.0888	67.7095	92.6729	76.7017	79.1198	65.1198	70.0756
24.8977	56.0185	56.3491	21.8502	42.4471	44.7961	66.7744	83.5985	78.5601	72.0935	78.1183	77.512
24.1395	56.9535	51.9374	40.1276	41.5093	38.0042	61.0658	85.7886	85.7173	76.7964	78.6064	72.8804
28.2783	95.9333	40.191	28.3316	35.8105	36.5794	72.6351	108.971	75	73.4964	73.9527	76.3733
22.7612	104.229	50.8891	37.2213	22.7474	39.1168	62.8775	89.1818	77.9967	75.7654	73.578	72.922

## Sheet: Figure 7
Raw data of Figure 7
Figure 7C
Li vs Model(log2FC)	CON vs Model(log2FC)
2.18025	4.30714
-2.81721	-3.0213
-2.85973	-20.5098
6.00875	2.47569
-1.70634	-4.38944
2.06547	1.88976
-2.48956	-7.32551
-1.1272	-3.82477
-1.81919	-4.83859
-2.42945	-4.41427
-2.53068	-6.32552
-2.50215	-6.46371
9.48306	5.45229
1.66095	2.35417
1.30106	3.05654
-1.07626	-3.37031
1.09097	1.60437
-2.57081	-3.08784
1.73854	2.39381
1.46846	1.75391
-2.07568	-5.39301
-1.65644	-4.96686
-1.07626	-2.18142
-2.38117	-9.4817
1.1098	1.59616
-3.73274	-20.4761
-2.08001	-6.55012
-1.08949	2.28488
1.54596	2.04287
7.8518	4.00439
-1.41187	-2.70373
-2.03991	-5.26832
-1.3572	-2.17953
1.703	3.40614
2.64474	4.6149
-1.41202	-4.77059
6.43287	3.73976
-1.71471	-4.79865
5.52163	2.53937
-1.92292	-6.03471
-1.01849	-7.3322
-2.29835	-5.84527
-1.74899	-3.30813
-1.7267	-3.16207
-2.40414	-4.29385
-2.40613	-9.39435
-1.03897	2.50334
1.03913	3.14236
-1.27222	-2.15081
-1.23449	-2.36367
1.62981	1.62315
10.9334	6.81733
1.74591	1.84815
-2.64635	-8.61887
20.9713	20.7394
-1.75077	-4.1645
-1.69438	-6.05261
-1.5423	-1.06235
-2.05356	-4.44499
1.34519	4.13274
-2.09619	-4.33986
-1.49069	-2.95406
-1.61167	-3.83269
-1.408	-1.92172
-2.12847	-7.2457
-2.39548	-5.01975
1.17893	3.01456
-2.1171	-6.2357
-2.23616	-5.16103
-1.84829	-5.79262
4.48976	1.60456
-2.09575	-7.03957
1.20844	1.71351
-2.67058	-6.41175
1.3308	1.0374
-2.56781	-4.99683
-1.38968	-4.14769
4.0449	6.19944
1.44162	2.21862
1.50831	1.17168
1.60228	2.29008
1.35487	1.9001
5.06125	1.73731
1.02052	1.36731
1.75996	1.0342
-1.81376	-3.65152
25.5684	20.7992
3.12021	3.2378
1.27258	2.94531
-2.2203	-4.31874
1.01745	2.01376
-1.1838	-1.58574
-2.00298	-6.95162
-1.41095	-4.98263
-2.54985	-2.04175
-1.28131	-1.12977
1.22346	1.41956
1.59662	1.88933
-2.87139	-5.61021
-2.55954	-6.67326
-2.4838	-8.87397
1.80861	2.01001
2.02351	2.10451
2.57499	2.14822
-1.05606	-1.16504
-1.26079	-1.60599
-1.69983	-4.80876
-1.37968	-1.35508
-1.67246	-2.544
-1.00064	-2.25555
-1.67044	-1.64625
2.3717	2.25652
4.4422	4.05017
-2.10733	-6.65091
1.39467	1.4125
1.51934	1.88582
-1.68456	-1.94157
-1.16058	-1.55989
1.47272	1.47776
3.44315	5.64798
-2.83667	-5.98756
-2.23202	-21.8416
-1.0172	-4.76044
-1.74336	-4.33878
-3.0727	-7.47495
1.77813	1.85999
1.14602	3.42331
-1.75388	-5.15179
1.05948	1.50202
-2.25136	-4.48805
-1.53518	-6.00328
3.07648	2.87643
-2.35709	-5.78623
-1.08012	-1.22321
1.6657	4.21962
-2.45786	-4.97174
4.15538	1.73317
-1.36956	-5.16995
-2.51416	-7.82011
1.71079	1.23255
-2.8326	-5.45005

## Sheet: Figure 8
Raw data of Figure 8
Figure 8F						Figure 8G						Figure 8H						Figure 8I
CON	Model	Li25	Li50	Li100	EMA	CON	Model	Li25	Li50	Li100	EMA	CON	Model	Li25	Li50	Li100	EMA	CON	Model	Li25	Li50	Li100	EMA
4.5067	10.5395	6.0088	8.9931	4.82	10.4117	1.8563	14.9702	7.4869	4.5402	5.5593	6.7265	110.975	65.3579	65.7897	98.1267	116.181	105.141	8.5704	2.1248	4.2272	4.2985	4.9603	5.9474
6.0836	12.5818	7.2343	10.736	7.3477	6.0264	4.0522	10.8412	5.0234	3.7134	4.8248	6.5028	144.596	66.5234	85.0087	80.9747	92.249	104.728	7.1524	2.7801	3.0459	6.7661	7.1712	7.9616
3.0205	11.86	8.251	9.3992	8.329	3.3427	3.9821	8.5349	7.0068	6.4016	3.2058	5.8789	120.015	51.5714	61.0113	85.9471	97.2328	80.2707	6.8331	1.9667	3.9427	6.0072	7.1028	8.4396
5.7608	13.0285	10.174	6.0721	7.5709	6.1701	3.0401	8.7318	9.7383	4.3494	4.3107	6.688	100.15	69.2413	82.0027	93.8226	81.2701	83.7093	7.6638	4.6255	4.3622	6.9553	5.6825	5.2056
2.8996	8.0378	11.0593	6.8767	7.8415	6.2821	3.963	13.6963	8.9614	5.4572	6.537	6.0938	106.645	61.4875	82.9942	75.1484	77.0498	99.3217	5.7669	2.0634	4.9937	6.0272	6.6964	5.6823
4.8806	14.0053	11.1126	8.286	9.2475	9.3191	2.2949	14.5015	8.3185	5.7045	3.5093	5.1397	114.101	54.8972	82.2993	79.4602	97.401	106.053	5.619	3.9024	5.8816	3.5019	5.666	4.9319
Figure 8J						Figure 8K
CON	Model	Li25	Li50	Li100	EMA	CON	Model	Li25	Li50	Li100	EMA
0.900785	4.09086	1.96203	1.95307	2.08961	1.70379	1.0941	4.8276	2.65965	1.43238	1.41765	1.53109
1.1507	3.69685	1.67091	1.9513	1.93598	1.68021	0.971339	4.75915	2.33452	2.26758	1.49445	1.30932
1.05666	3.64259	1.86938	1.88638	2.08514	1.94115	0.93771	3.81383	2.84808	2.4488	1.24846	0.944867
0.975769	4.74289	2.03649	2.09211	2.0825	1.94994	1.30113	4.11859	2.41199	1.39738	1.23726	1.4591
1.02992	3.66104	1.83849	1.70766	1.87281	1.77842	0.878727	4.59168	2.81991	2.20011	0.8362	1.19688
0.886172	3.80207	1.93019	1.78548	1.74411	2.07028	0.816996	4.4072	2.5755	2.29839	1.17539	1.55057

## Sheet: Figure 9
Raw data of Figure 9
Figure 9G						Figure 9H						Figure 9I
CON	Model	Li25	Li50	Li100	EMA	CON	Model	Li25	Li50	Li100	EMA	CON	Model	Li25	Li50	Li100	EMA
0.954058	1.39243	1.40168	1.00792	1.16917	1.11772	1.04225	0.288389	0.747916	1.17407	1.33507	1.64332	0.851489	0.699425	1.10487	1.346	1.20173	0.796489
1.06901	1.88812	1.41476	1.22399	1.06212	1.11746	0.873299	0.497005	0.69834	0.904318	1.12828	1.57829	1.01044	0.684466	1.33644	1.18601	1.16449	1.21724
1.01994	1.66337	1.36449	0.94826	0.787589	0.667253	0.991254	0.593311	0.792579	0.988602	1.1671	1.13277	1.54588	0.827904	0.98733	0.931265	1.27932	0.869986
0.881459	1.92553	1.45383	1.21242	1.16841	1.0936	1.0932	0.370234	1.13977	1.38692	1.1365	1.31222	1.22421	0.792118	1.1889	1.15353	1.05387	1.25641
Figure 9J						Figure 9K
CON	Model	Li25	Li50	Li100	EMA	CON	Model	Li25	Li50	Li100	EMA
0.8893	0.592535	0.841535	1.01273	1.06289	0.944166	1.04087	1.62194	1.00909	1.04895	0.587356	0.855452
1.03577	0.655271	1.19956	1.13574	1.06078	1.15464	0.866172	1.37634	0.499584	0.267745	0.276026	0.353636
1.01884	0.616812	1.13728	1.23942	1.13698	1.18573	1.14925	1.37495	1.00565	0.759487	0.802511	0.690736
1.0561	0.691064	0.984589	0.93888	1.1278	1.01564	0.943703	1.62141	1.07787	0.906982	0.533666	0.499186

## Sheet: Figure 10
Raw data of Figure 10
Figure 10E						Figure 10F						Figure 10G						Figure 10H
CON	Model	Li25	Li50	Li100	EMA	CON	Model	Li25	Li50	Li100	EMA	CON	Model	Li25	Li50	Li100	EMA	CON	Model	Li25	L50	Li100	EMA
1.13121	1.59806	0.81134	1.04712	0.986375	0.902905	0.755392	1.81796	1.3812	1.10658	1.02264	1.08163	1.21646	1.52671	1.22334	1.0568	0.897248	0.346517	1.05444	1.51787	1.06106	0.913852	0.783468	1.01775
0.808105	1.27935	1.12767	0.645342	0.419782	1.18292	0.854384	1.20578	0.965468	0.944029	0.969011	1.16367	0.286003	1.83789	1.21935	1.0413	1.45586	1.71744	1.0579	1.30697	1.07862	0.75916	0.408528	0.32125
1.13884	1.52718	1.11449	1.1319	1.16089	1.58158	1.14539	1.34657	0.989829	0.6857	1.03206	0.844617	1.42184	2.2482	0.764996	0.40244	0.350797	0.996654	0.952205	1.34293	0.443729	0.303684	0.28658	0.327962
0.92185	1.28344	1.30711	0.788691	0.861459	1.98708	1.24484	1.40177	0.894879	0.529174	0.238106	0.390094	1.07569	2.36498	1.24725	0.844413	0.975799	0.798658	0.935453	0.983203	0.651617	0.338895	0.315242	0.336212
Figure 10I						Figure 10J						Figure 10K
CON	Model	Li25	Li50	Li100	EMA	CON	Model	Li25	Li50	Li100	EMA	CON	Model	Li25	Li50	Li100	EMA
1388.07	2260.55	1578.45	1405.79	1475.85	1621.29	0.469022	0.744432	0.644167	0.451066	0.552325	0.598661	4.8258	14.7913	14.7888	12.9072	11.5157	12.0515
1388.93	2416.72	1890.04	1796.85	1649.35	1772.93	0.327307	1.09755	0.747822	0.577365	0.439283	0.468581	7.2148	32.5417	11.8924	10.8235	10.5375	13.6069
1283.81	2022.66	2027.89	1889.52	1720	1859.95	0.429347	0.768357	0.606456	0.423179	0.464077	0.592325	7.95544	13.4556	11.5309	11.4514	10.2972	13.1797
1453.79	1982.41	1713.07	1953.16	1705.77	1869.95	0.403224	0.842863	0.572969	0.633309	0.495666	0.531554	9.15012	16.4358	12.6771	12.3148	7.93424	12.0742
1288.83	2285.76	2071.29	1819.65	1827.08	1798.82	0.434913	0.708421	0.61032	0.468699	0.497873	0.544675	5.38972	15.8697	14.4323	14.8262	14.0959	10.9793
1216.97	2490.43	1657.08	1906.87	1405.29	1608.1	0.487771	0.967889	0.642352	0.594012	0.54844	0.504312	4.45643	16.6903	10.9229	11.5335	13.1797	13.0862

## Sheet: Figure 11
Raw data of Figure 10
Figure 11C						Figure 11D						Figure 11E
CON	Model	Li25	Li50	Li100	EMA	CON	Model	LI25	LI50	LI100	EMA	CON	Model	Li25	Li50	Li100	EMA
1.40007	1.74187	2.45862	2.01945	2.30635	1.88333	1.02784	1.45561	1.0838	0.979146	0.784043	0.537858	1.0167	1.12483	0.808601	0.648046	0.650149	0.664428
1.40128	1.60445	2.59997	3.3298	2.82009	3.22318	1.22045	1.38185	1.096	0.834604	0.810384	0.807642	0.821006	1.39423	0.802091	0.574241	0.607563	0.702695
0.764348	1.02175	1.81998	1.71016	3.46898	1.87813	0.977238	0.842297	0.622937	0.300911	0.315558	0.458087	0.975861	1.08322	0.827391	0.668297	0.341922	0.373937
0.434303	0.56375	1.39237	1.68594	2.47248	1.76818	0.567368	1.16098	0.836808	0.700769	0.349066	0.600159	1.18643	1.27445	1.10423	0.89475	0.781498	0.638275
Figure 11F						Figure 11G						Figure 11H
CON	Model	Li25	Li50	Li100	EMA	CON	Model	Li25	Li50	Li100	EMA	CON	Model	Li25	Li50	Li100	EMA
0.895511	0.347337	0.466675	0.700652	1.27149	1.26519	1.12052	0.490884	0.780628	1.2061	1.26847	1.87573	5.5212	7.7272	29.5488	26.5578	37.5104	27.2522
0.885922	0.503449	0.872199	1.03182	1.33187	1.5622	0.938369	0.51154	0.863646	0.888325	1.57826	1.17179	6.2103	4.0856	22.1167	30.9404	38.4123	26.4745
1.07237	0.833575	0.986994	1.36932	1.18088	0.855772	0.932978	0.680798	0.904567	1.20026	1.28672	1.15307	5.607	7.0658	22.4093	32.9377	34.7609	26.8315
1.1462	0.358036	0.689547	1.13681	1.14685	1.02037	1.00813	0.776152	1.14383	1.41986	1.32835	0.96514	4.4952	4.5356	29.3069	31.9282	33.3543	33.7764
												5.1984	5.2968	22.7922	27.6555	36.689	34.2851
												5.8825	6.1714	26.7907	26.4646	41.5748	29.9614

## Sheet: Supplementary information I
Raw data of Supplementary information I
	Figure S1
Weeks	CON							Model							Li25							Li50							Li100							EMA
1	4.98	4.92	4.04	3.6	4.55	4.76	3.93	3.93	4.84	4.62	4.38	3.43	4.53	4.33	3.48	3.34	4.57	3.8	4.35	4.15	3.34	4.69	3.03	3.86	4.82	4.27	4.2	4.58	4.47	3.96	4.19	4.06	3.35	3.82	4.05	4.97	4.62	4.73	4.17	4.56	4.3	3.92
2	4.02	4.19	4.77	4.49	4.76	3.2	4.63	4.46	3.86	3.25	3.68	3.41	3.71	4.43	4.86	3.66	3.88	4.03	4.96	4.87	3.67	4.95	4.85	3.56	4.06	3.88	4.7	3.56	4.69	4.44	4.12	4.98	4.7	4.77	3.28	4.03	4.7	3.98	3.58	4.39	4.66	3.93
3	4.46	3.83	3.56	4.02	3.31	4.11	3.83	3.76	3.64	4.56	4.66	3.59	4.37	4.98	4.14	4.63	3.82	3.23	3.66	3.47	3.58	3.3	3.42	3.64	3.4	4.46	4.24	3.07	4.07	4.38	4.51	3.74	3.98	4.55	4.26	3.13	3.33	3.78	4.2	3.03	4.45	3.83
4	3.86	3.27	4.8	4.33	4.68	4.93	4.47	3.8	3.43	4.51	4.35	4.74	4.24	3.6	4.91	4.56	4.55	4.22	4.72	3.64	4.74	3.33	4.53	4.6	3.68	3.57	4.95	4.7	4.3	4.23	4.91	4.18	4.41	4.21	4.73	3.57	4.71	3.32	4.32	4.86	4.29	3.47
5	4.61	4.57	4.46	3.33	3.83	4.75	3.37	3.73	3.55	3.68	4.4	4.5	4.45	4.47	3.54	3.35	4.85	4.85	4.13	3.84	3.51	4.79	4.4	4.99	4.49	4.28	3.71	3	4.52	3.37	4.14	3.84	4.68	4.93	3.14	4.51	4.3	3.74	3.73	3.55	3.77	4.98
6	4.59	4.85	3.55	3.44	3.13	3.21	3.52	3.46	3.31	4.74	3.08	4.04	4.78	4.25	4.74	4.99	4.08	4.9	3.96	4.86	4.79	3.61	3.22	4.73	3.51	4.92	3.95	3.98	3.9	4.46	4.84	4.18	3.6	3.86	4.08	4.76	4.05	4.97	3.59	4.95	4.68	3.28
7	4.96	3.43	3.98	4.05	4.18	3.49	3.15	4.21	4.51	4.06	4.82	3.57	4.34	3.7	4.14	4.08	4.94	4.17	3.19	4.04	4.36	4.39	4.07	3.61	4.67	4.76	4.84	4.66	4.1	3.82	4.58	4.29	4.82	3.56	3.92	4.7	4.78	3.49	3.83	3.95	3.2	3.2
8	3.19	4.25	4.3	3.71	3.1	3.31	3.5	3.98	3.46	4.08	4.36	4.19	4.1	3.39	3.42	4.86	3.92	3.38	4.17	3.93	3.88	4.16	4.71	3.06	4.42	4.56	3.21	4.68	3.25	4.49	3.14	3.41	3.64	4.38	3.95	4.98	4.67	3.47	4.86	4.7	3.97	4.42
9	3.42	4.09	3.65	4.73	4.7	4.09	4.94	3.56	3.42	4.14	3.46	4.36	3.63	4.14	4.54	3.13	4.78	4.14	3.96	4.87	3.3	4.08	4.5	4.91	3.23	3.87	3.02	3.26	4.81	4.61	3.01	3.06	3.59	3.72	4.14	3.78	3.11	4.89	3.68	3.14	3.26	4.81
10	4.86	4.23	3.31	3.98	3.96	3.8	3.73	3.26	4.91	4.29	4.15	4.55	4.94	3.56	3.2	4.99	4.51	3.69	4.91	4.01	4.47	3.38	4.25	4.33	4.22	4.39	3.42	4.84	3.38	4.26	4.64	3.03	3.43	4.02	4.22	3.64	4.51	4.3	4.79	4.46	4.07	4.99
11	4.28	4.16	4.27	3.51	3.45	4.68	4.12	4.31	4.22	4.73	3.35	3.89	4.23	3.85	4.34	4.09	3.56	4.61	4.28	3.41	3.27	4.36	3.6	3.44	4.45	3.82	4.45	3.93	3.47	4.12	3.91	3.2	3.3	3.37	3.96	4.46	4.81	4.95	3.87	4.47	3.55	4.85
12	4.48	3.19	3.78	4.73	4.37	4.91	4.39	4.58	4.07	3.16	4.05	3.9	4.32	3.64	4.35	3.14	4.02	3.96	4.66	3.74	3.53	4.92	4.62	3.02	3.27	3.13	3.51	4.92	3.9	3.02	4.84	3.19	3.96	4.25	3.71	3.71	3.32	4.43	3.62	4.65	3.65	4.67
Table S1
Group	EF	FS	LVAW;d	LVAW;s	LVID;d	LVID;s	LVPW;d	LVPW;s	e'/a'	E/A	E/e'	Body weight	SBP	DBP
CON	76.4446	44.226	0.834043	1.39007	3.53599	1.97216	0.660284	1.17287	1.24841	1.38917	18.4932	26	92.52	77.01
	69.2371	38.2883	0.738475	1.31188	3.85745	2.3805	0.608156	1.0773	1.35099	1.22416	25.6604	29	93.35	70.66
	85.7958	53.9474	0.860106	1.47695	3.30142	1.52039	0.703723	1.34663	1.25294	1.39933	19.2445	28	98	75.17
	69.6431	38.2871	0.781915	1.33794	3.44911	2.12855	0.67766	0.97305	1.15863	1.09406	23.942	26.2	92.5	78.2
	74.6051	42.5	0.920922	1.33794	3.47518	1.99823	0.642908	1.0773	1.10968	1.33074	25.1542	27.8	104.68	72.48
	65.5709	34.8315	0.834043	1.38138	3.09291	2.0156	0.616844	0.938298	1.15094	1.29172	20.664	26.9	99.27	79.59
	73.5743	41.9283	1.06862	1.61596	3.87482	2.25018	0.668972	1.0773	1.12962	1.35972	21.5212	27	104.99	77.75
	77.956	46.093	0.795429	1.44075	4.04794	2.18212	0.591745	1.14793	1.31646	1.09973	19.3217	28.1	98.87	73.82
	75.5298	43.7363	0.894858	1.52908	3.95301	2.22411	0.599468	1.18156	1.34553	1.41199	21.1883	27.2	104.86	77.25
	72.9034	41.1483	0.660284	1.19894	3.63156	2.13723	0.573404	1.11206	1.23154	1.18353	24.1247	25.2	102.37	65.98
Model	75.1602	42.8941	1.05993	1.72021	3.36223	1.92003	0.747163	1.09468	0.696224	0.944795	47.2655	37.5	123.1	96.62
	77.9344	44.9231	1.05124	1.67677	2.82358	1.55514	0.790603	1.06862	0.584746	1.41362	55.7909	33.9	130.62	108.89
	74.546	42.5075	0.842248	1.45587	3.54307	2.037	0.759551	1.00474	0.710407	1.78255	37.8334	33.5	123.21	94.69
	62.204	33.0036	0.82632	1.2945	3.9033	2.61507	0.752312	1.04255	0.489362	1.11105	50.6477	32.4	132.79	99.17
	70.2023	38.3041	0.97305	1.53777	2.97128	1.83316	0.816667	1.05993	0.741176	1.83752	48.7553	30.6	130.55	98.08
	79.9872	47.6543	0.747163	1.59858	3.51862	1.84184	0.721099	1.08599	0.569231	1.43066	47.2197	38.6	123.04	100.53
	77.4389	44.6377	0.97305	1.67677	2.99734	1.6594	0.860106	1.225	0.537447	1.41746	51.3857	36.4	121.89	100.94
	61.9135	32.619	0.84273	1.32057	3.64894	2.45869	0.84273	0.912234	0.56	1.06067	44.1222	38.1	133.49	107.21
	71.0369	39.5683	0.721099	1.35532	3.62287	2.18936	0.67766	0.851418	0.584795	0.947174	42.9988	35.4	132.82	107.95
	68.8765	37.907	0.747163	1.4422	3.73582	2.31968	0.721099	1.05993	0.652893	1.13862	53.2304	38.3	128	90.46
Li25	73.3931	41.6076	0.781915	1.25106	3.675	2.14592	0.816844	1.05993	0.688104	1.36181	45.7361	36.2	128.14	102.61
	67.9689	36.4985	0.97305	1.39876	2.92784	1.85922	0.738475	1.03387	0.693878	1.1908	49.1573	31.9	124.93	94.27
	72.1096	40.2089	0.981738	1.39876	3.32748	1.98954	0.782092	0.990426	0.667067	1.03754	47.9462	31.8	127.82	90.12
	67.8467	36.747	0.886382	1.39431	3.3065	2.09146	0.756911	1.03577	0.804348	2.01097	42.2527	33.7	123.09	109.03
	64.183	34.4444	0.807979	1.24238	3.90957	2.56294	0.668972	0.946986	0.691425	1.57295	43.6722	32.3	125.28	103.39
	76.7804	44.2971	0.67766	1.28582	3.27535	1.82447	0.708156	0.825355	0.439394	0.873389	53.1383	38.4	121.12	93.84
	70.2737	39.0187	0.834043	1.5117	3.71844	2.26755	0.721099	1.17287	0.529412	1.302	39.2029	38.1	122.92	103.47
	73.8971	41.9512	0.868794	1.65071	3.56206	2.06773	0.721099	1.25106	0.704706	1.70059	52.1677	37.9	130.67	105.77
	82.8283	50.5181	0.955674	1.58121	3.35355	1.6594	0.790603	1.30319	0.569697	1.11862	48.0837	34.5	118.52	108.59
	77.8195	45.1253	0.999113	1.70284	3.11897	1.71152	0.712411	1.16418	0.486238	1.26512	51.9285	36.7	121.24	107.8
Li50	70.0852	38.8095	0.97305	1.57252	3.64894	2.2328	0.781915	1.26844	0.710733	1.05449	58.5684	37.9	134.96	105.85
	74.2218	42.1836	0.651596	1.56383	3.50124	2.02429	0.738475	0.990426	0.617451	1.48819	53.4338	34.8	133.75	92.56
	65.3978	34.9421	0.938298	1.41396	3.37527	2.19588	0.742819	1.1012	0.737288	1.30303	51.3923	31.5	118.01	103.54
	74.0946	42.0792	0.781915	1.52039	3.50993	2.03298	0.686348	1.08599	0.665585	1.76699	51.4426	32.3	126.82	91.2
	75.4805	43.3048	0.896341	1.44411	3.49573	1.98191	0.657317	1.13537	0.563775	0.94382	48.0216	30.7	129.57	109.31
	80.0216	47.5579	0.860106	1.55514	3.37961	1.77234	0.686348	1.13812	0.440217	0.982847	45.447	37.7	130.49	100.07
	62.0216	32.4675	0.755851	1.33794	3.34486	2.25887	0.747163	1.0078	0.45625	1.01793	43.717	35.9	121.31	104.93
	66.9507	36.0526	1.16418	1.63333	3.30142	2.11117	0.738475	1.01649	0.730797	1.42985	42.1856	36.1	127.19	109.14
	75.4195	43.4833	0.534309	1.4422	3.76622	2.12855	0.651596	1.16418	0.722807	1.74164	39.4498	35.8	122.28	106.58
	75.1637	43	1.03387	1.62464	3.47518	1.98085	0.84273	1.25106	0.705898	0.838872	38.2284	39.1	127.09	96.23
Li100	84.2674	52.1851	0.920922	1.59858	3.37961	1.61596	0.651596	1.21631	0.57732	1.34184	58.8017	37.4	124.6	109.46
	77.6792	45	1.05993	1.58989	3.12766	1.72021	0.799291	1.13812	0.529888	1.34511	54.8967	33.8	123.3	107.56
	69.4791	38.2353	0.807979	1.45089	3.54468	2.18936	0.747163	1.14681	0.628368	1.16887	49.5824	31.5	125.31	90.82
	69.7097	38.3041	0.736992	1.50386	3.4061	2.10142	0.746951	0.995935	0.443293	1.47456	49.6006	31	126.23	97.73
	77.4033	44.9704	0.886382	1.50386	3.36626	1.85244	0.76687	1.12541	0.565095	1.3647	48.0829	31	122.18	108.63
	61.0374	31.6923	0.946138	1.40427	3.23679	2.21098	0.786789	0.92622	0.803545	1.20517	45.7217	39.2	118.54	90.49
	60.1941	30.9659	0.825355	1.23369	3.05816	2.11117	0.712411	0.825355	0.831698	1.32305	43.9505	38.3	129.59	104.47
	64.3889	34.434	0.990426	1.4422	3.68369	2.41525	0.764539	1.03387	0.615492	1.3862	45.2737	37.3	122.98	91.66
	73.7695	41.8079	1.00589	1.67317	3.52561	2.05163	0.796748	1.37439	0.813253	1.43288	39.696	34.6	118.4	90.47
	80.4641	48.4018	0.616844	1.45089	3.80532	1.96348	0.729787	1.21631	0.526531	1.12908	38.3455	39.4	133.13	104.99
EMA	72.7978	41.2556	0.790603	1.47695	3.87482	2.27624	0.807979	1.05124	0.674455	2.10601	57.1461	36.2	129.28	96.25
	70.4753	38.9313	0.946986	1.32057	3.41436	2.08511	0.738475	0.92961	0.630662	1.15621	55.2463	32.9	125.55	90.84
	60.9575	32.2917	0.860106	1.35532	4.17021	2.82358	0.625532	1.05993	0.663934	1.14844	49.8364	34.7	120.31	91.98
	73.6684	41.5584	0.999113	1.66809	3.34486	1.95479	0.738475	1.19894	0.736855	1.06927	47.3203	34	126.35	102.24
	62.7318	33.0435	0.92622	1.64329	3.43598	2.30061	0.697154	1.08557	0.640719	1.22839	45.7341	28.8	125.14	100.32
	76.6701	44.389	0.999113	1.7984	3.48387	1.93741	0.84273	1.19894	0.5492	1.31491	42.9068	40	122.04	93.11
	65.1035	34.9765	0.738475	1.24238	3.70106	2.40656	0.599468	0.938298	0.490476	1.06279	40.0492	36.8	118.46	91.89
	69.3908	38.2212	0.938298	1.27713	3.61418	2.2328	0.834043	1.37269	0.734034	1.22226	46.6731	36.8	132.21	105.01
	87.9024	56.6038	0.834043	1.78972	3.22323	1.39876	0.877482	1.52908	0.686939	1.3905	47.0171	36.6	121.3	108.55
	76.784	44.82	0.704	1.442	3.857	2.129	0.765	1.155	0.644737	1.34952	47.0007	35.6	119.99	104.99
