# Supplementary material for: Dietary limonin ameliorates heart failure with preserved ejection fraction by targeting ferroptosis via modulation of the Nrf2/SLC7A11/GPX4 axis: an integrated transcriptomics and metabolomics analysis
Source: Royal Society of Chemistry journal article supplement (doi:10.1039/d5fo00475f), 2025-01-01
Supplement: d5fo00475f3.pdf [file d5fo00475f3.pdf]

## **Supplementary Information II**

**Figure S1 Western blot raw images of Fig. 9F in manuscript**

**Figure S2 Western blot raw images of Fig. 10D in manuscript**

**Figure S3 Western blot raw images of Fig. 11B in manuscript**

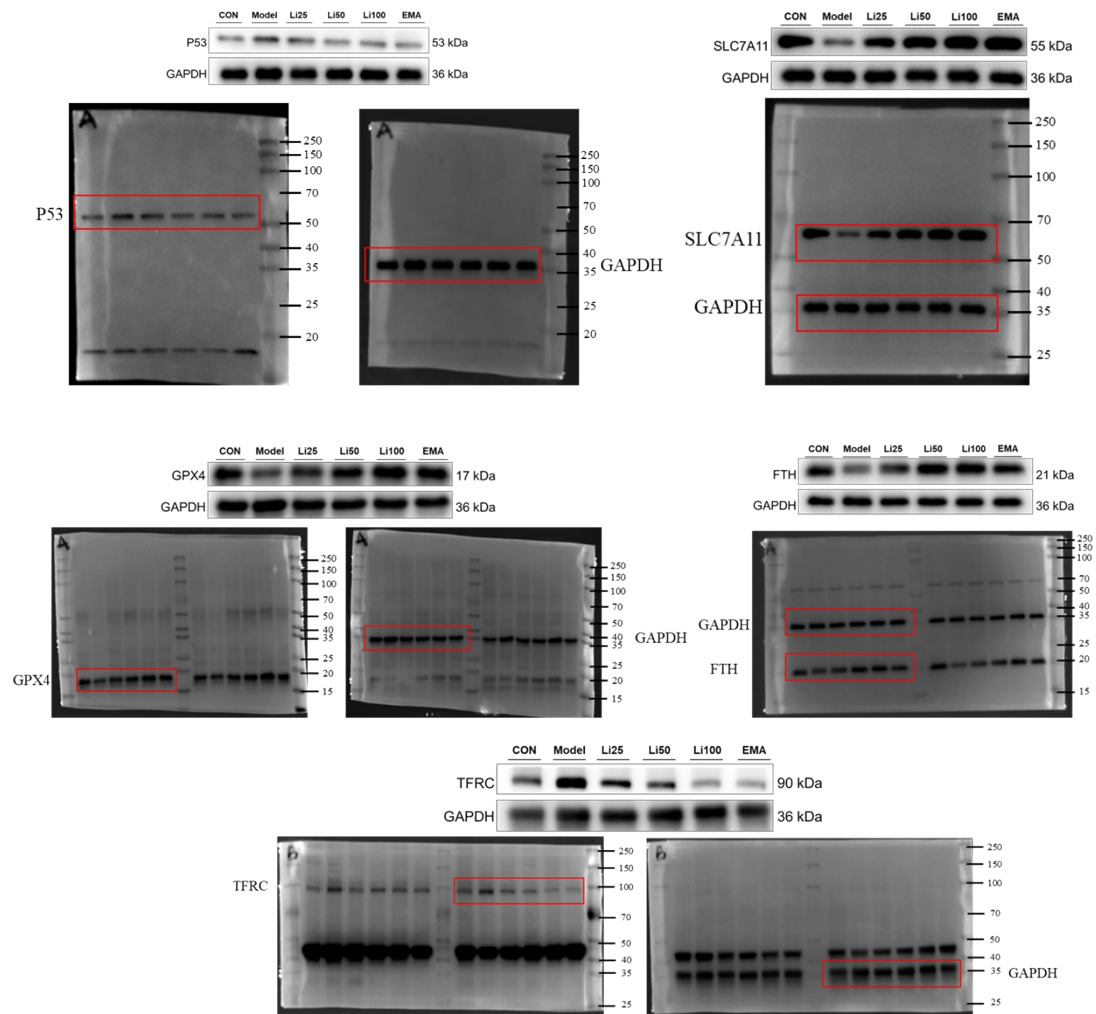

**Fig. S1 Western blot raw images of Fig. 9F in manuscript.**

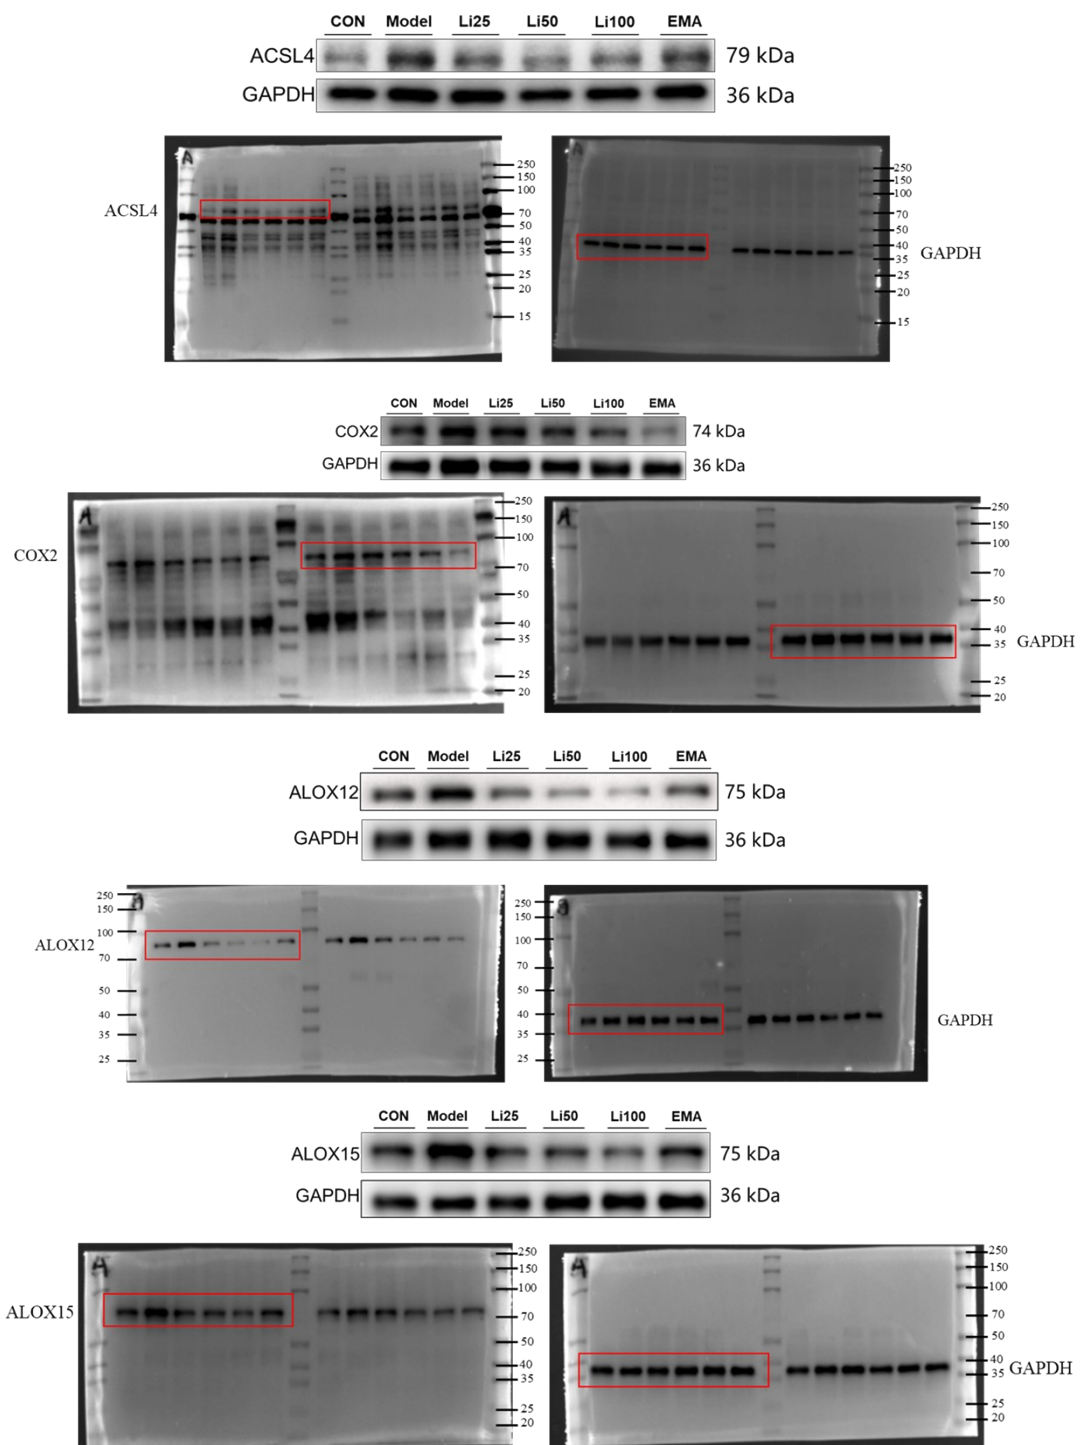

**Fig. S2 Western blot raw images of Fig. 10D in manuscript.**

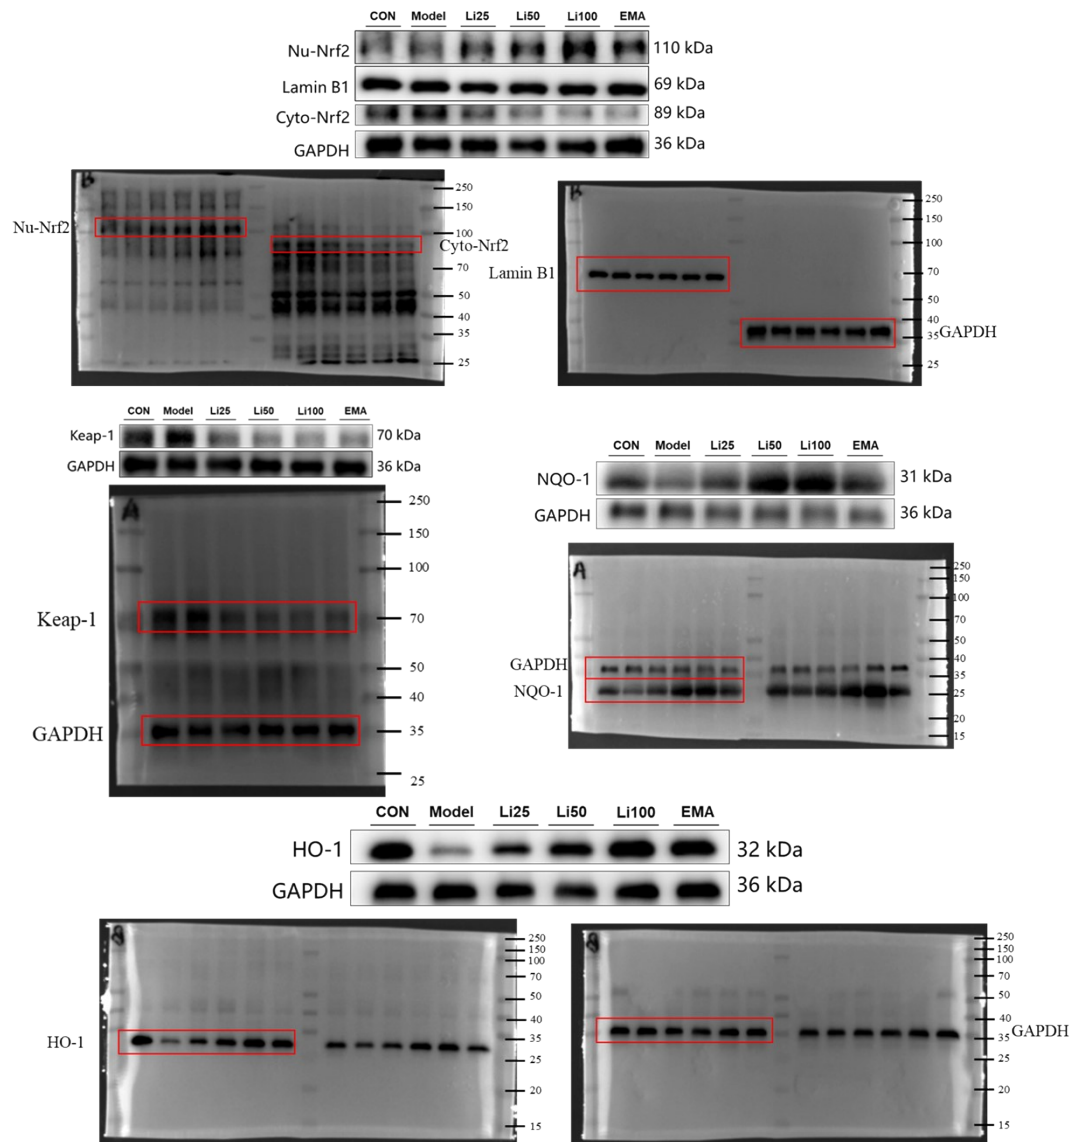

**Fig. S3** Western blot raw images of Fig. 11B in manuscript.
